# Supplementary material for: A facile approach to achieve bioinspired PDMS@Fe3O4 fabric with switchable wettability for liquid transport and water collection
Source: Royal Society of Chemistry journal article supplement (doi:10.1039/c8ta08993k), 2018-01-01
Supplement: c8ta08993k6.pdf [file c8ta08993k6.pdf]

## Supporting Information

### A facile approach to achieve bioinspired PDMS@Fe<sub>3</sub>O<sub>4</sub> fabric with switchable wettability for liquid transport and water collection

Deke Li,<sup>1,3</sup> Jinxia Huang,<sup>3</sup> Guocai Han<sup>1\*</sup> and Zhiguang Guo<sup>2,3\*</sup>

<sup>1</sup> School of materials engineering, Lanzhou Institute of Technology, Lanzhou 730050, People's Republic of China. E-mail: [hgclzu@163.com](mailto:hgclzu@163.com); Tel: +86-931-2868471

<sup>2</sup> Hubei Collaborative Innovation Centre for Advanced Organic Chemical Materials and Ministry of Education Key Laboratory for the Green Preparation and Application of Functional Materials, Hubei University, Wuhan 430062, People's Republic of China

<sup>3</sup> State Key Laboratory of Solid Lubrication, Lanzhou Institute of Chemical Physics, Chinese Academy of Sciences, Lanzhou 730000, People's Republic of China. E-mail: [zguo@licp.cas.cn](mailto:zguo@licp.cas.cn); Fax: +86-931-8277088; Tel: +86-931-4968105

\*Correspondence to: G. Han (E-mail: [hgclzu@163.com](mailto:hgclzu@163.com)), Z. Guo (E-mail: [zguo@licp.cas.cn](mailto:zguo@licp.cas.cn)).

**This ESI contains:**

Supplementary Tables

**Table S1** Water collection rates of the as-prepared samples

| Sample<br>(Fe <sub>3</sub> O <sub>4</sub> %) | 0      | 50     | 55     | 60     | 65     | 70     | 75     | 80     |
|----------------------------------------------|--------|--------|--------|--------|--------|--------|--------|--------|
| $K_0$ (Slope)                                | 1099.5 | 1161.6 | 1410.4 | 1816.1 | 2445.2 | 2737.8 | 3363.3 | 2790.3 |
| WCR (mg h <sup>-1</sup> cm <sup>-1</sup> )   |        | 26.9   | 134.6  | 310.2  | 582.6  | 709.2  | 980.0  | 731.9  |

Supplementary Figures

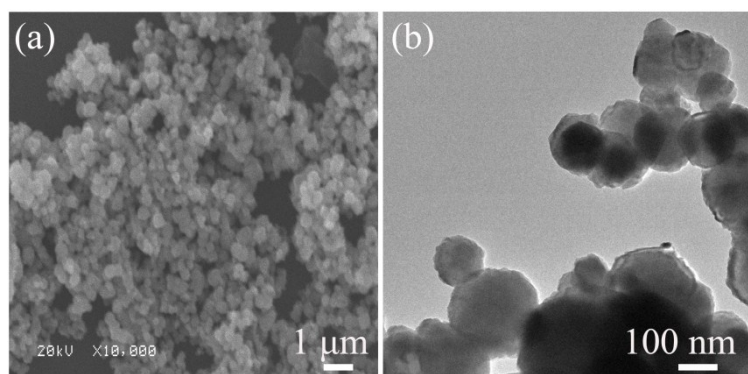

**Fig. S1†** SEM (a) and TEM (b) images of as-prepared  $\text{Fe}_3\text{O}_4$  NPs.

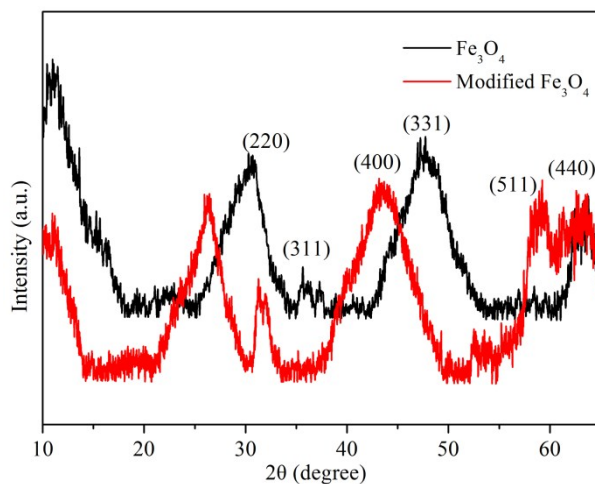

**Fig. S2†** (a) XRD pattern of the as-prepared  $\text{Fe}_3\text{O}_4$  NPs and modified  $\text{Fe}_3\text{O}_4$  NPs.

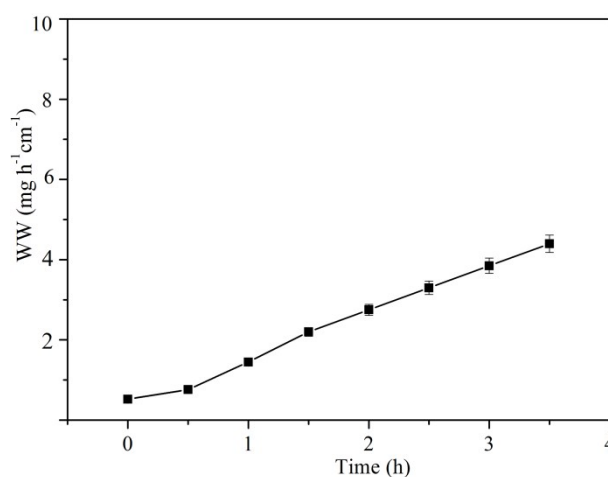

**Fig. S3†** Weight of water of the contrast sample water-collecting for 4 h.

#### Supplementary Movies

**Movie S1†** A water droplet is pinned onto the superhydrophobic surface and became immobile.

**Movie S2†** The switching ability between superhydrophobic and slippery states.

**Movie S3†** The unidirectional water delivery by manipulating the magnetic field direction.

**Movie S4†** The Self-cleaning behavior of PDMS@ $\text{Fe}_3\text{O}_4$  fabric (water dyed by alizarin red).

**Movie S5†** The fog-harvesting process of PDMS@Fe<sub>3</sub>O<sub>4</sub> fabric by adjusting microcilia direction.
